# Supplementary material for: Somatic mosaic chromosomal alterations and death of cardiovascular disease causes among cancer survivors: an analysis of the UK Biobank
Source: bioRxiv or medRxiv preprint supplement (doi:10.1101/2022.08.20.22279019), 2022-08-22

**A**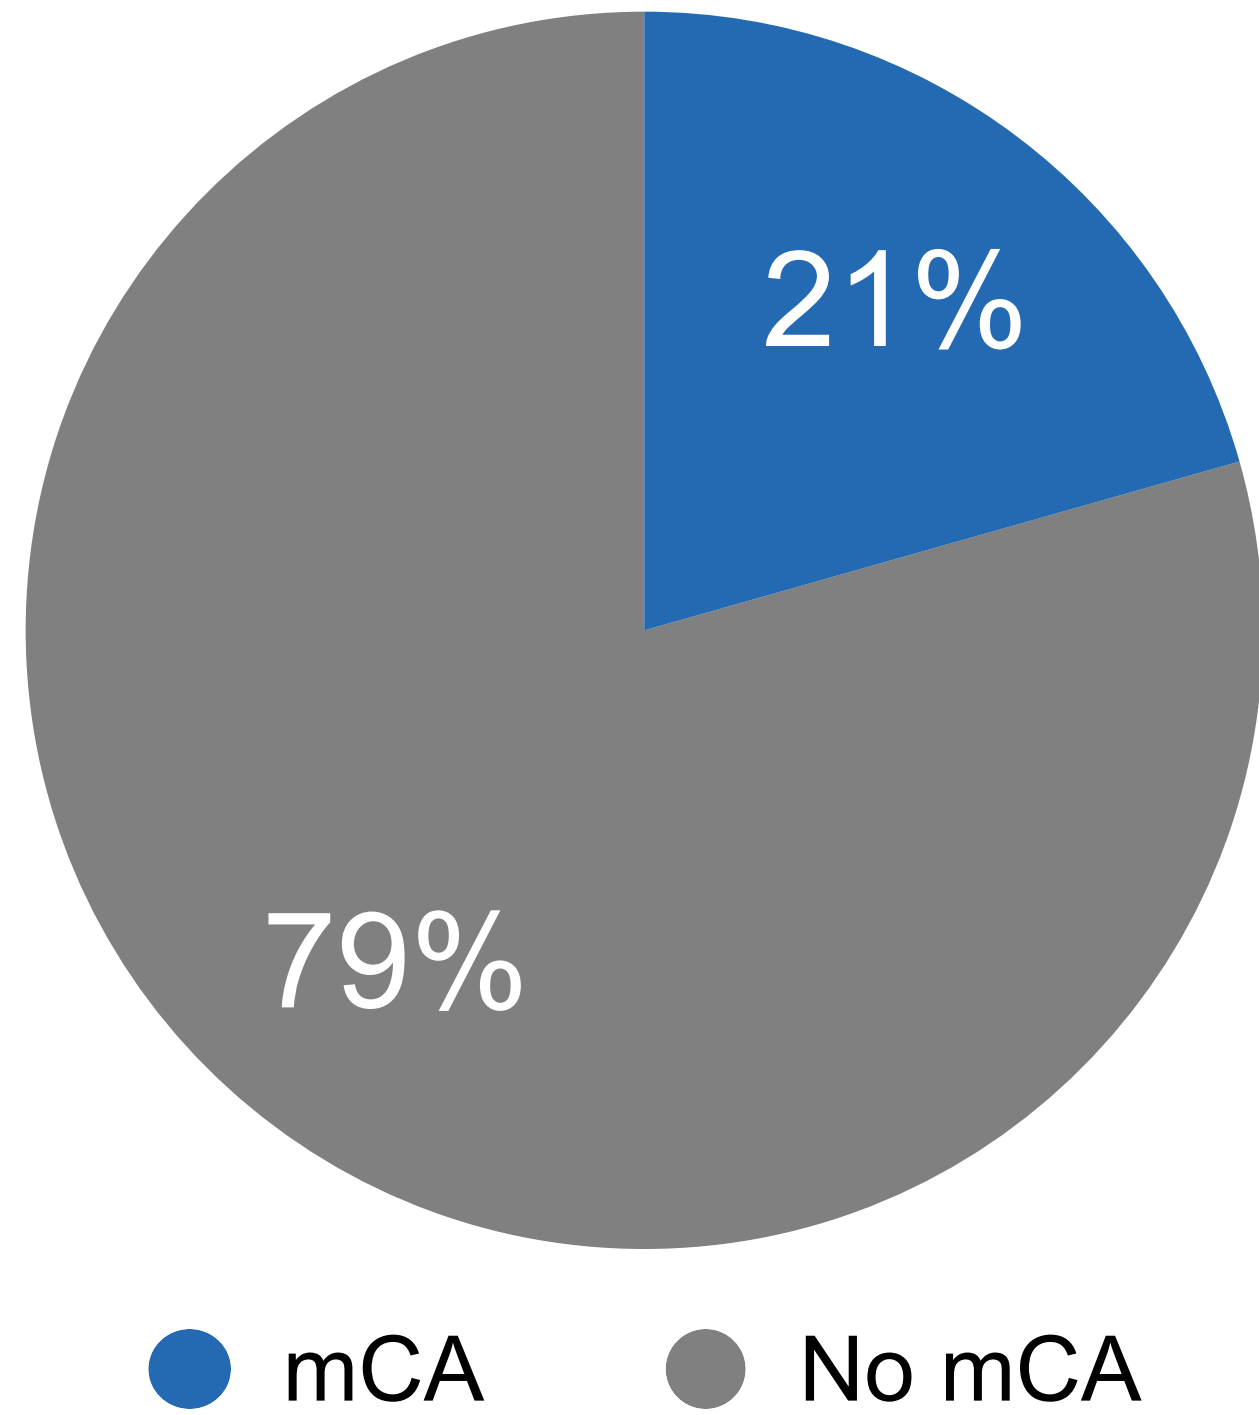**B**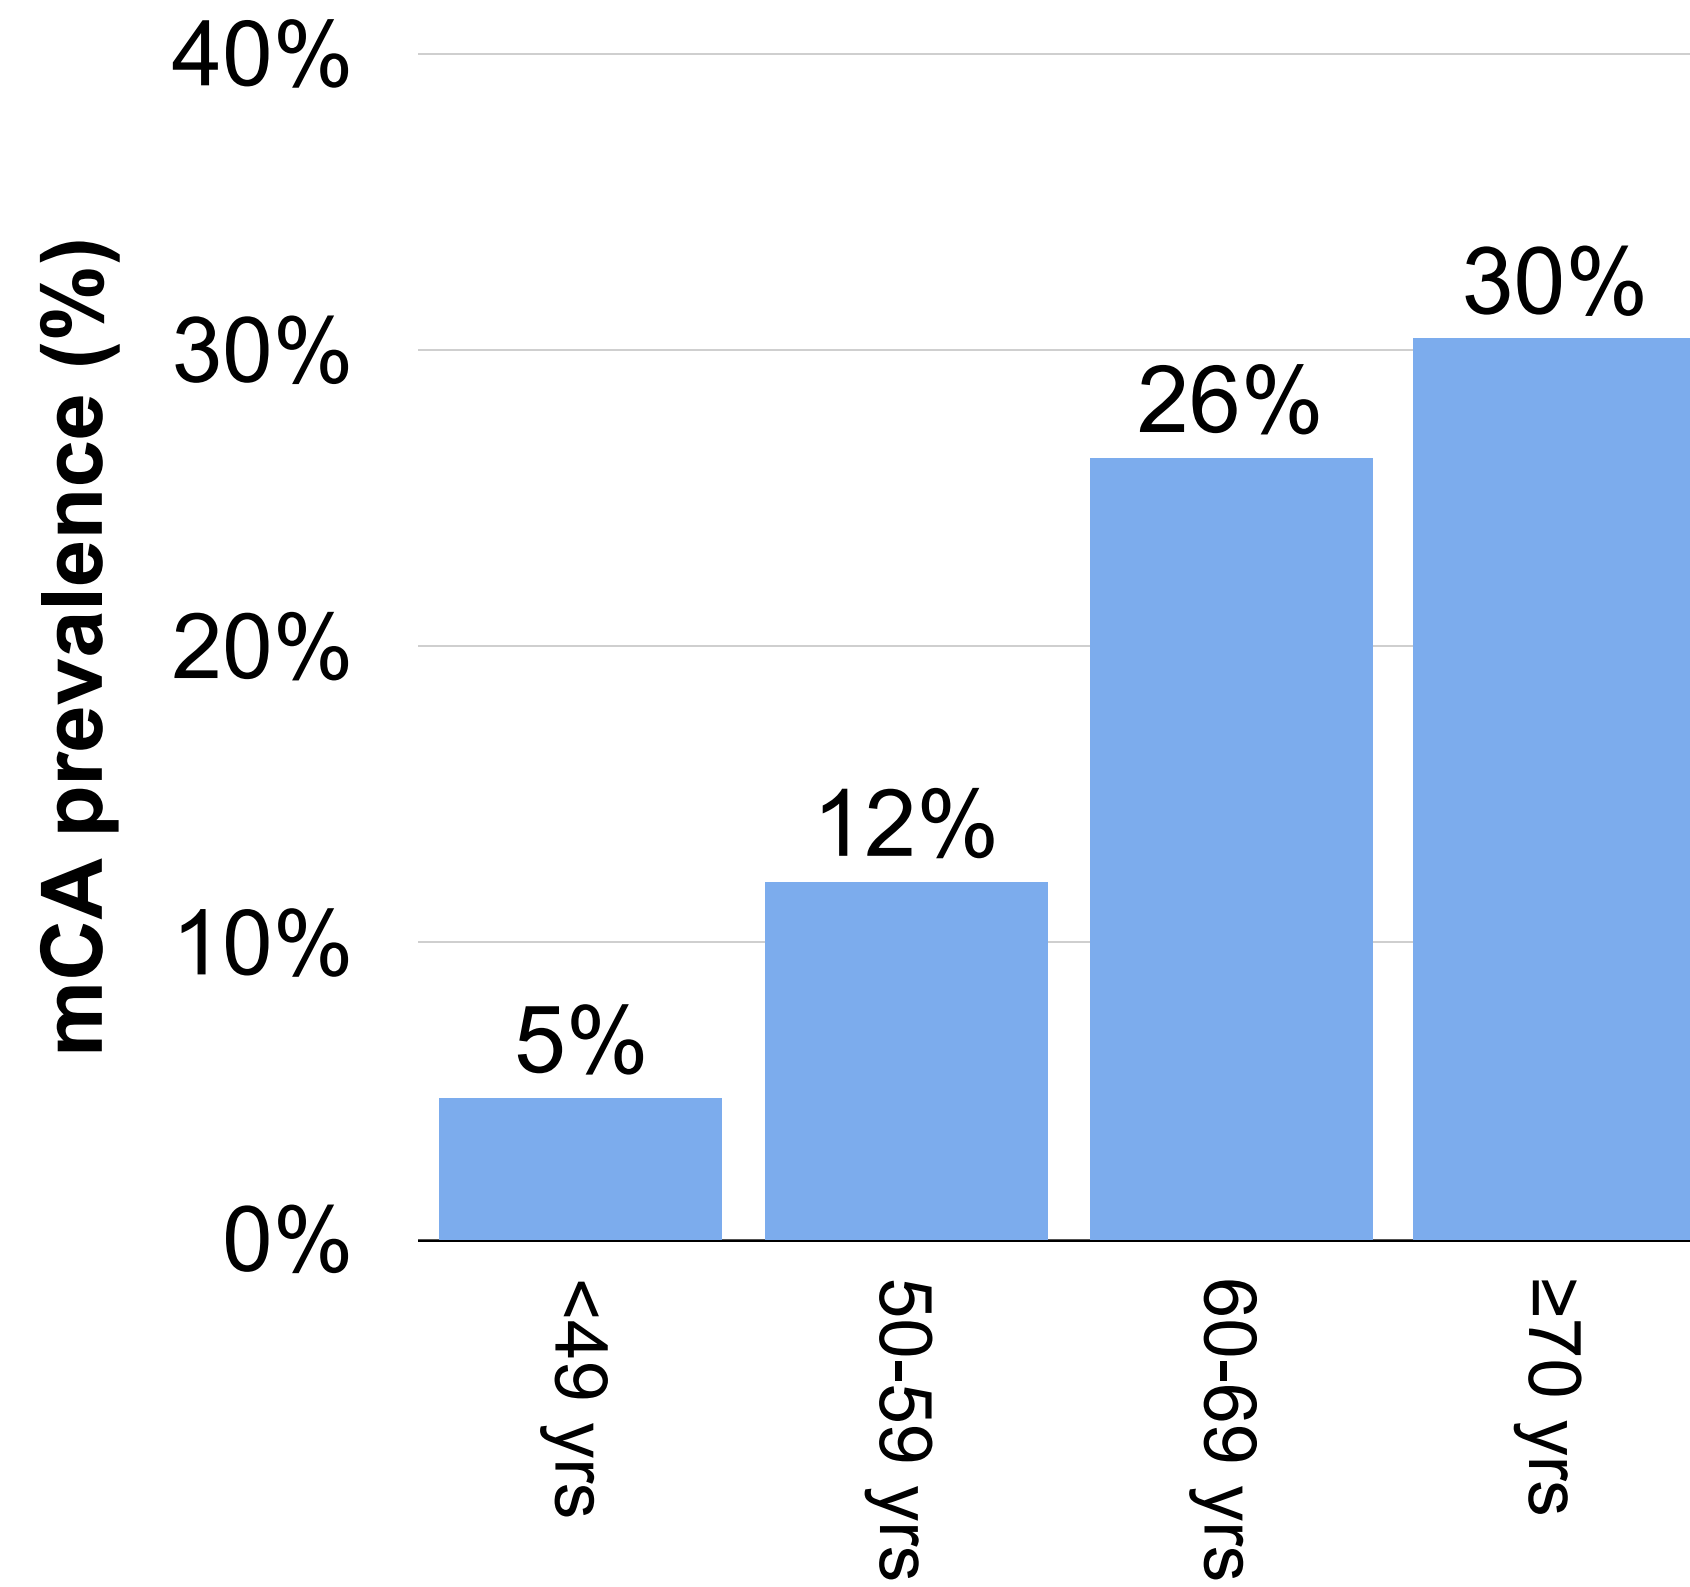**C**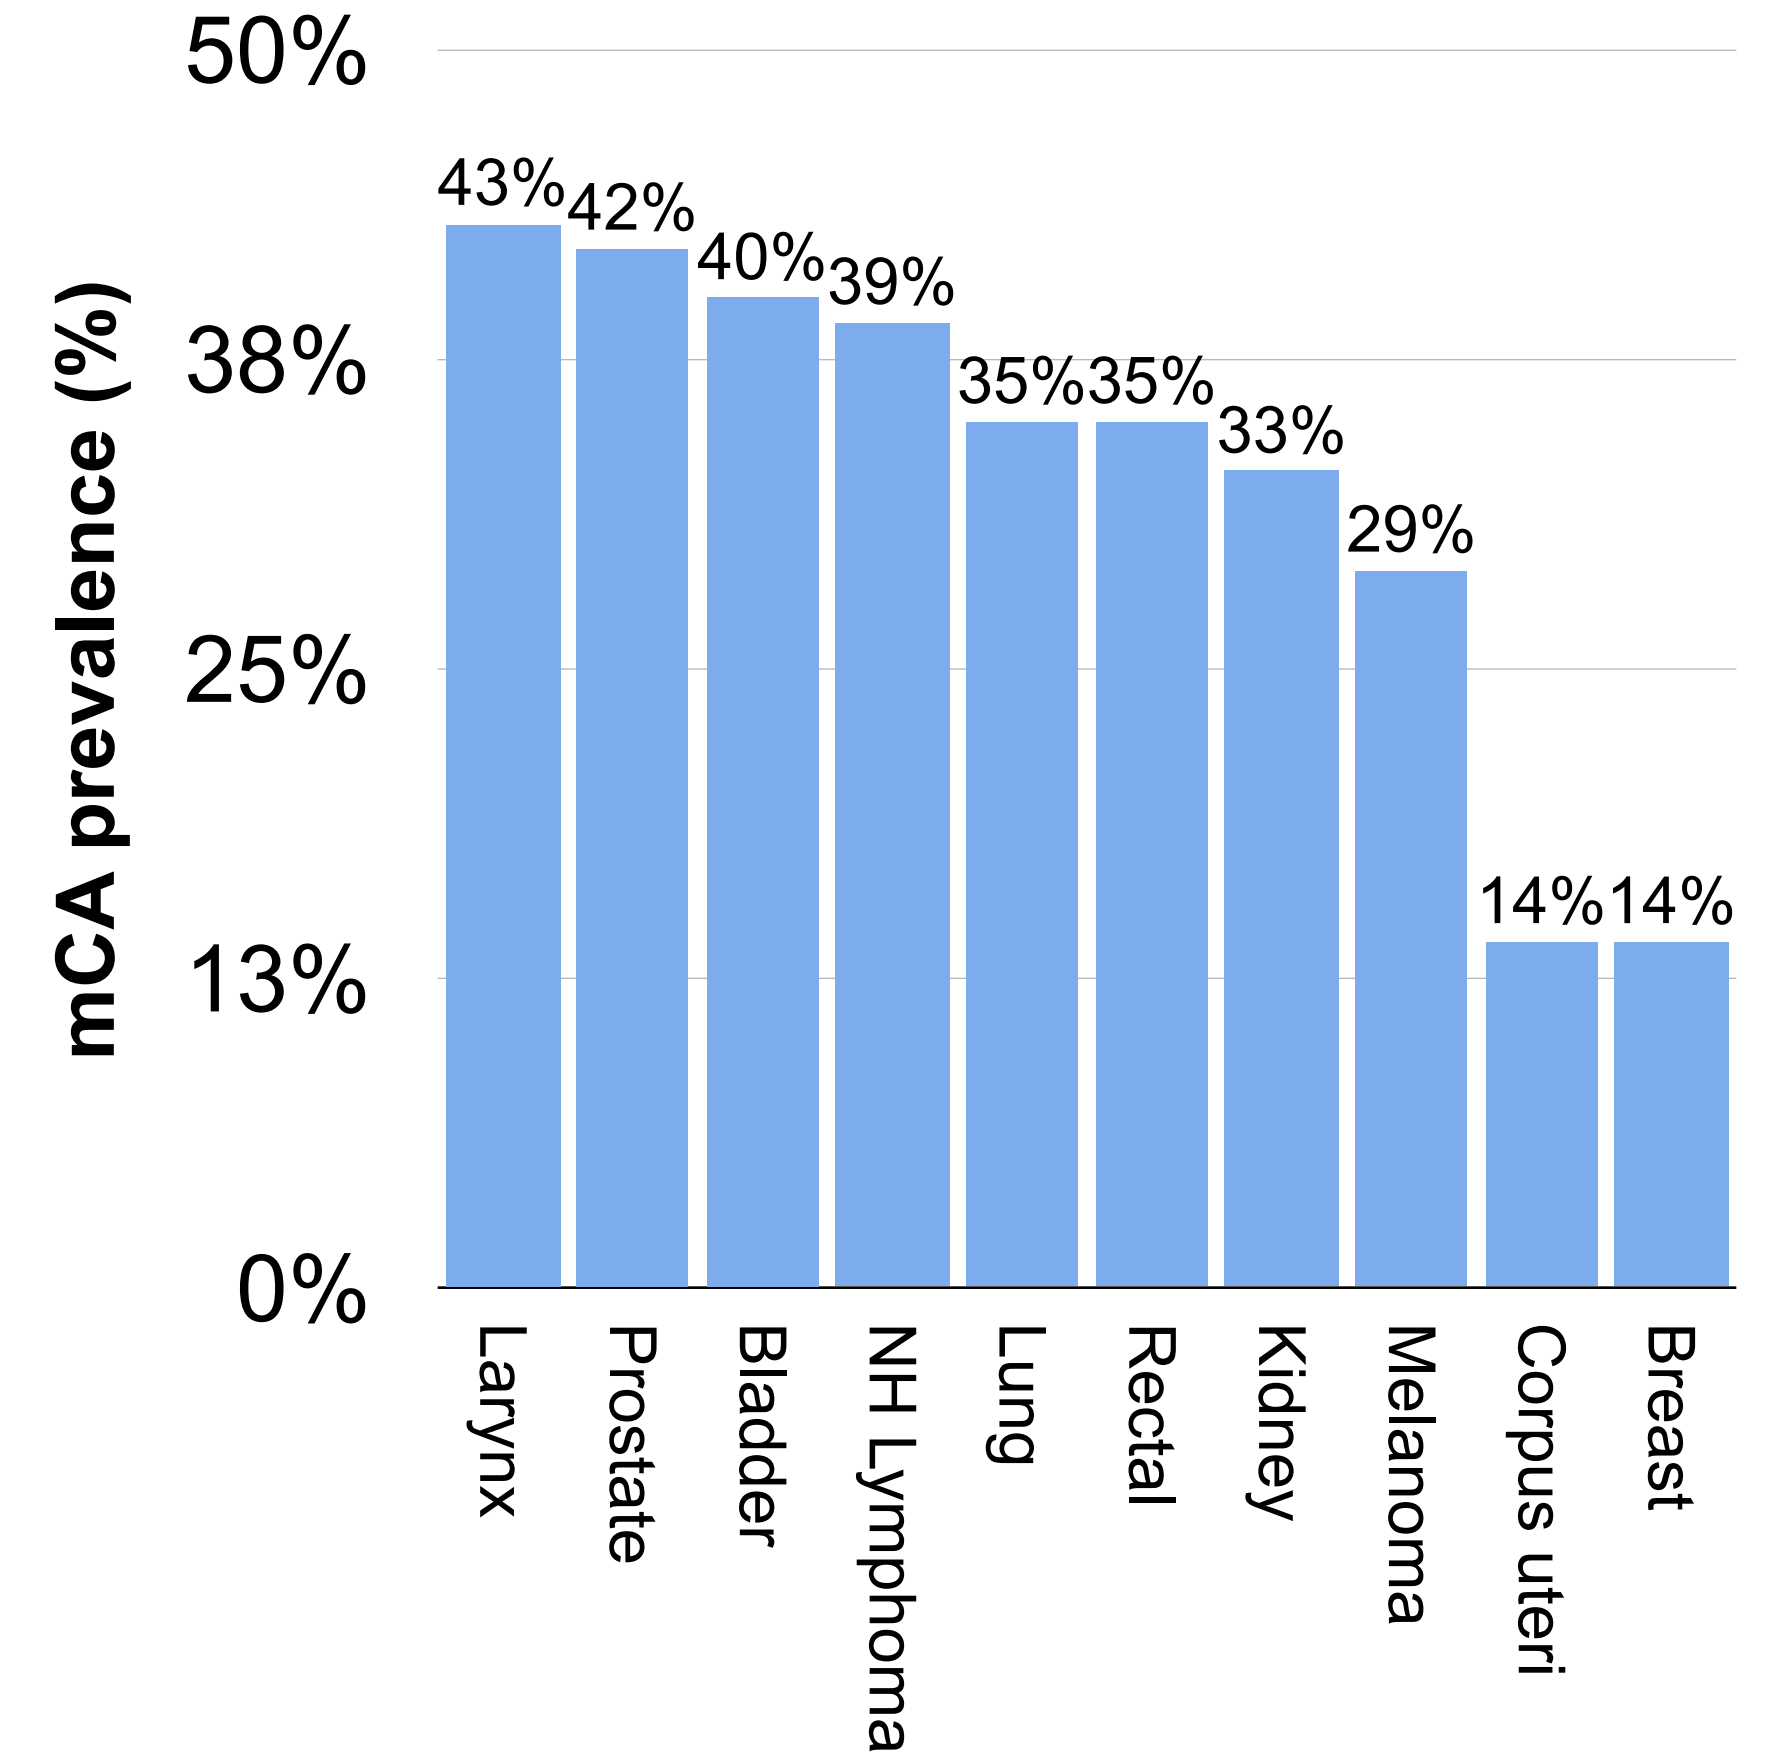

Supplement: Supplementary file [file media-1.pdf]
